# Supplementary material
Source: MDPI journal article supplement (https://www.mdpi.com/2227-9717/11/5/1523)
Supplement: s1 [file s1]

Table S1 The growth attributes of *L. esculentum* plants after treatment with single element (Cd, Zn or Ni) or co-contaminated conditions for 65d. (Data are shown as mean  $\pm$  SD, n = 3) .

|                                            | CK                 |                                 | Cd <sub>1</sub>                 |                                 | Cd <sub>2</sub>    |                                 | Cd <sub>3</sub>                 |                                 |
|--------------------------------------------|--------------------|---------------------------------|---------------------------------|---------------------------------|--------------------|---------------------------------|---------------------------------|---------------------------------|
| Root fresh weight (g·plant <sup>-1</sup> ) | 1.900 $\pm$ 0.124  |                                 | 1.321 $\pm$ 0.322               |                                 | 1.632 $\pm$ 0.211  |                                 | 1.651 $\pm$ 0.036               |                                 |
| Stem fresh weight (g·plant <sup>-1</sup> ) | 6.065 $\pm$ 0.329  |                                 | 8.034 $\pm$ 0.211               |                                 | 6.949 $\pm$ 0.309  |                                 | 2.327 $\pm$ 0.321               |                                 |
| Leaf fresh weight (g·plant <sup>-1</sup> ) | 5.768 $\pm$ 0.114  |                                 | 5.539 $\pm$ 0.446               |                                 | 4.292 $\pm$ 0.097  |                                 | 1.264 $\pm$ 0.133               |                                 |
| Plant Height (cm·plant <sup>-1</sup> )     | 23.923 $\pm$ 0.899 |                                 | 35.560 $\pm$ 0.548              |                                 | 32.066 $\pm$ 0.875 |                                 | 15.321 $\pm$ 0.600              |                                 |
|                                            | Zn <sub>1</sub>    | Zn <sub>1</sub> Cd <sub>1</sub> | Zn <sub>1</sub> Cd <sub>2</sub> | Zn <sub>1</sub> Cd <sub>3</sub> | Zn <sub>2</sub>    | Zn <sub>2</sub> Cd <sub>1</sub> | Zn <sub>2</sub> Cd <sub>2</sub> | Zn <sub>2</sub> Cd <sub>3</sub> |
| Root fresh weight (g·plant <sup>-1</sup> ) | 0.831 $\pm$ 0.437  | 2.340 $\pm$ 0.181               | 1.641 $\pm$ 0.233               | 0.814 $\pm$ 0.078               | 1.349 $\pm$ 0.314  | 1.957 $\pm$ 0.274               | 1.878 $\pm$ 0.213               | 1.180 $\pm$ 0.382               |
| Stem fresh weight (g·plant <sup>-1</sup> ) | 3.506 $\pm$ 0.225  | 3.835 $\pm$ 0.339               | 2.197 $\pm$ 0.096               | 1.292 $\pm$ 0.172               | 5.601 $\pm$ 0.229  | 1.321 $\pm$ 0.113               | 1.675 $\pm$ 0.345               | 2.093 $\pm$ 0.312               |
| Leaf fresh weight (g·plant <sup>-1</sup> ) | 6.279 $\pm$ 0.227  | 2.796 $\pm$ 0.270               | 1.349 $\pm$ 0.133               | 0.983 $\pm$ 0.218               | 5.016 $\pm$ 0.307  | 0.700 $\pm$ 0.138               | 0.874 $\pm$ 0.224               | 0.611 $\pm$ 0.219               |
| Plant Height (cm·plant <sup>-1</sup> )     | 24.753 $\pm$ 0.890 | 19.827 $\pm$ 0.295              | 16.920 $\pm$ 0.485              | 13.590 $\pm$ 0.335              | 32.029 $\pm$ 1.316 | 14.225 $\pm$ 0.860              | 12.782 $\pm$ 0.132              | 10.309 $\pm$ 0.341              |
|                                            | Zn <sub>3</sub>    | Zn <sub>3</sub> Cd <sub>1</sub> | Zn <sub>3</sub> Cd <sub>2</sub> | Zn <sub>3</sub> Cd <sub>3</sub> | Ni <sub>1</sub>    | Ni <sub>1</sub> Cd <sub>1</sub> | Ni <sub>1</sub> Cd <sub>2</sub> | Ni <sub>1</sub> Cd <sub>3</sub> |
| Root fresh weight (g·plant <sup>-1</sup> ) | 1.626 $\pm$ 0.253  | 0.849 $\pm$ 0.024               | 0.934 $\pm$ 0.417               | 0.753 $\pm$ 0.274               | 1.783 $\pm$ 0.199  | 1.994 $\pm$ 0.512               | 1.696 $\pm$ 0.098               | 1.314 $\pm$ 0.226               |
| Stem fresh weight (g·plant <sup>-1</sup> ) | 1.827 $\pm$ 0.461  | 1.528 $\pm$ 0.500               | 1.529 $\pm$ 0.077               | 1.097 $\pm$ 0.418               | 7.216 $\pm$ 0.201  | 1.729 $\pm$ 0.331               | 1.839 $\pm$ 0.390               | 1.497 $\pm$ 0.194               |
| Leaf fresh weight (g·plant <sup>-1</sup> ) | 0.938 $\pm$ 0.199  | 0.268 $\pm$ 0.214               | 0.377 $\pm$ 0.299               | 0.123 $\pm$ 0.079               | 5.660 $\pm$ 0.202  | 2.871 $\pm$ 0.474               | 1.577 $\pm$ 0.566               | 1.178 $\pm$ 0.211               |
| Plant Height (cm·plant <sup>-1</sup> )     | 16.231 $\pm$ 1.166 | 9.634 $\pm$ 0.349               | 8.286 $\pm$ 0.072               | 6.064 $\pm$ 0.593               | 32.399 $\pm$ 1.399 | 20.975 $\pm$ 0.674              | 16.899 $\pm$ 1.068              | 12.627 $\pm$ 0.504              |
|                                            | Ni <sub>2</sub>    | Ni <sub>2</sub> Cd <sub>1</sub> | Ni <sub>2</sub> Cd <sub>2</sub> | Ni <sub>2</sub> Cd <sub>3</sub> | Ni <sub>3</sub>    | Ni <sub>3</sub> Cd <sub>1</sub> | Ni <sub>3</sub> Cd <sub>2</sub> | Ni <sub>3</sub> Cd <sub>3</sub> |
| Root fresh weight (g·plant <sup>-1</sup> ) | 1.846 $\pm$ 0.276  | 1.879 $\pm$ 0.153               | 1.121 $\pm$ 0.352               | 1.160 $\pm$ 0.495               | 1.744 $\pm$ 0.173  | 1.009 $\pm$ 0.200               | 1.060 $\pm$ 0.291               | 0.601 $\pm$ 0.150               |
| Stem fresh weight (g·plant <sup>-1</sup> ) | 5.113 $\pm$ 0.043  | 1.648 $\pm$ 0.224               | 1.705 $\pm$ 0.274               | 1.5773 $\pm$ 0.322              | 3.332 $\pm$ 0.332  | 1.457 $\pm$ 0.193               | 1.598 $\pm$ 0.090               | 0.346 $\pm$ 0.213               |
| Leaf fresh weight (g·plant <sup>-1</sup> ) | 3.832 $\pm$ 0.291  | 1.701 $\pm$ 0.355               | 1.153 $\pm$ 0.402               | 0.902 $\pm$ 0.619               | 2.528 $\pm$ 0.333  | 1.347 $\pm$ 0.349               | 1.062 $\pm$ 0.419               | — —                             |
| Plant Height (cm·plant <sup>-1</sup> )     | 25.253 $\pm$ 0.376 | 17.071 $\pm$ 0.486              | 12.388 $\pm$ 1.184              | 10.647 $\pm$ 0.636              | 18.413 $\pm$ 0.983 | 13.047 $\pm$ 0.052              | 11.422 $\pm$ 0.346              | 5.217 $\pm$ 0.153               |
